# Supplementary material for: Kinetics and mechanism of 3,6′-disin apoylsucrose, tenuifoliside A, tenuifoliside B and tenuifoliside C degradation in aqueous solutions
Source: Royal Society of Chemistry journal article supplement (doi:10.1039/c5ay01824b), 2015-01-01
Supplement: c5ay01824b1.pdf [file c5ay01824b1.pdf]

## Supplementary data 2: The chromatographic of 3,6'-Disin apoylsucrose, tenuifoliside A, tenuifoliside B and tenuifoliside C

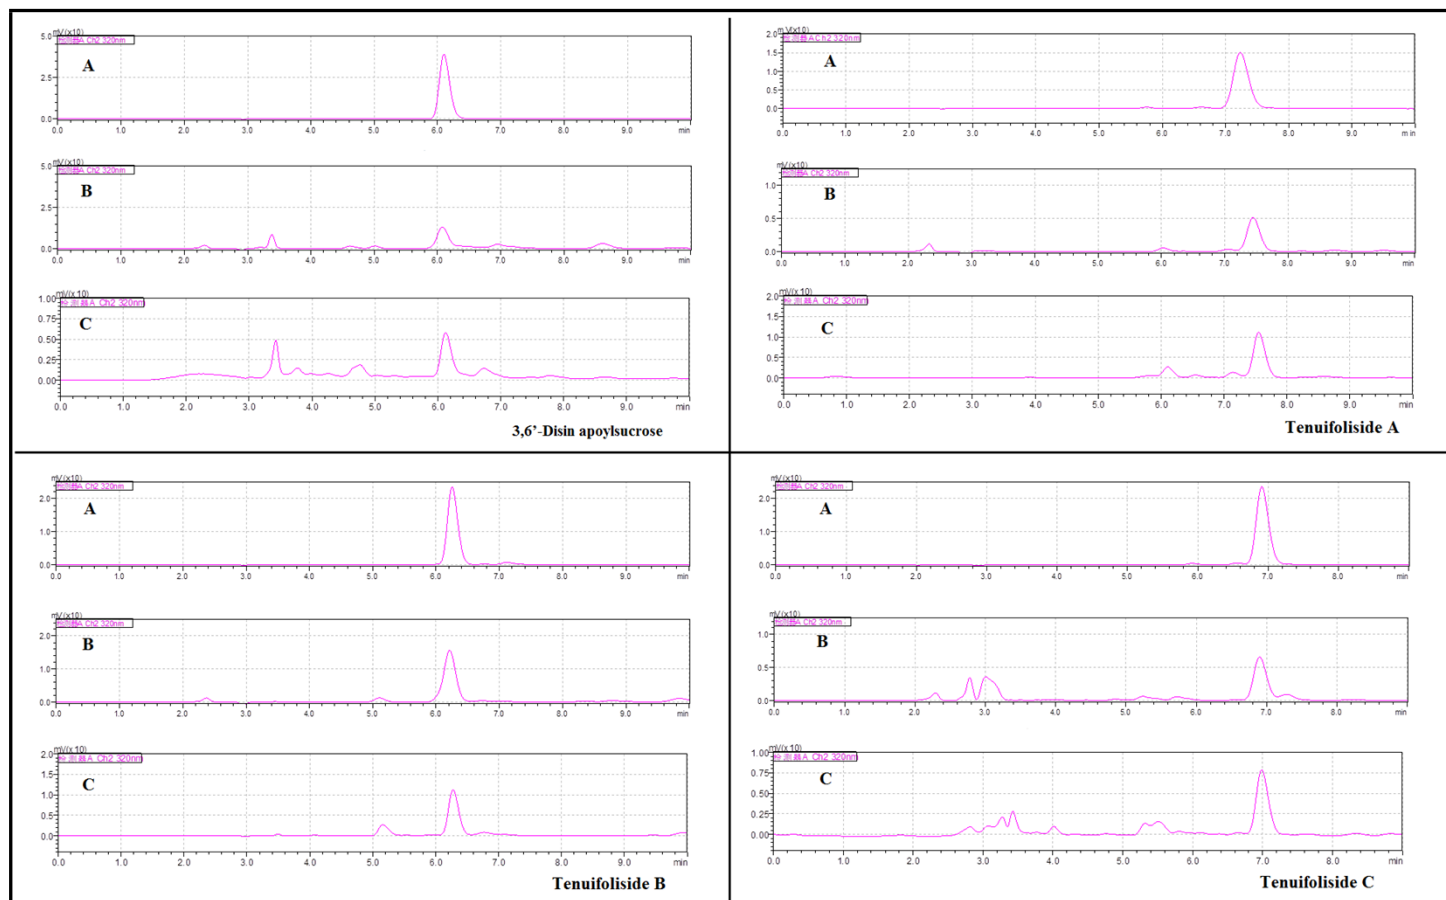

Note: The chromatographic A was standards, B was under heat condition, C was under alkaline condition.
