# Supplementary material for: Kinetics and mechanism of 3,6′-disin apoylsucrose, tenuifoliside A, tenuifoliside B and tenuifoliside C degradation in aqueous solutions
Source: Royal Society of Chemistry journal article supplement (doi:10.1039/c5ay01824b), 2015-01-01
Supplement: c5ay01824b3.pdf [file c5ay01824b3.pdf]

**Supplementary data 3: The composition of different pH buffer solutions**

| <b>pH Value</b> | <b><i>Disodium hydrogen phosphate</i></b><br><b><i>(0.2 mol/L)</i></b> | <b><i>Citric acid</i></b><br><b><i>(0.1 mol/L)</i></b> |
|-----------------|------------------------------------------------------------------------|--------------------------------------------------------|
| 2.2             | 0.4 mL                                                                 | 10.6 mL                                                |
| 3.0             | 2.05 mL                                                                | 7.95 mL                                                |
| 4.0             | 3.85 mL                                                                | 6.15 mL                                                |
| 5.0             | 5.15 mL                                                                | 4.85 mL                                                |
| 6.0             | 6.32 mL                                                                | 3.68 mL                                                |
| 7.0             | 8.24 mL                                                                | 1.76 mL                                                |
| 8.0             | 9.72 mL                                                                | 0.28 mL                                                |

  

|      | <b><i>Sodium carbonate</i></b><br><b><i>(0.1 mol/L)</i></b> | <b><i>Sodium hydrogen carbonate</i></b><br><b><i>(0.1 mol/L)</i></b> |
|------|-------------------------------------------------------------|----------------------------------------------------------------------|
| 9.1  | 1.0 mL                                                      | 9.0 mL                                                               |
| 9.9  | 5.0 mL                                                      | 5.0 mL                                                               |
| 10.8 | 9.0 mL                                                      | 1.0 mL                                                               |
